# Supplementary material for: The Y3** ncRNA promotes the 3′ end processing of histone mRNAs
Source: PubMed Central journal article supplement (PMC4604341; doi:10.1101/gad.266486.115), 2015-10-01

A

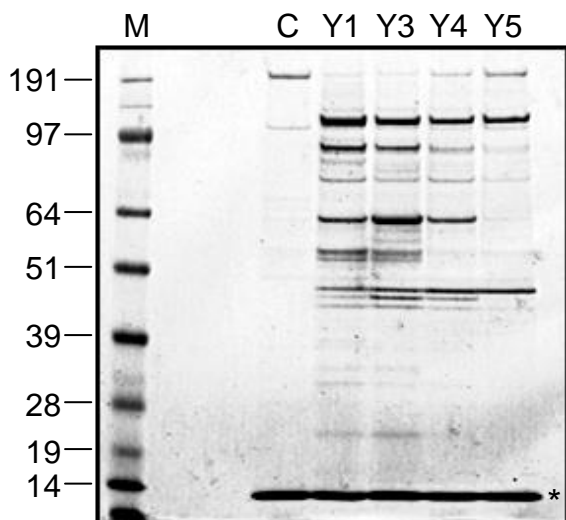

B

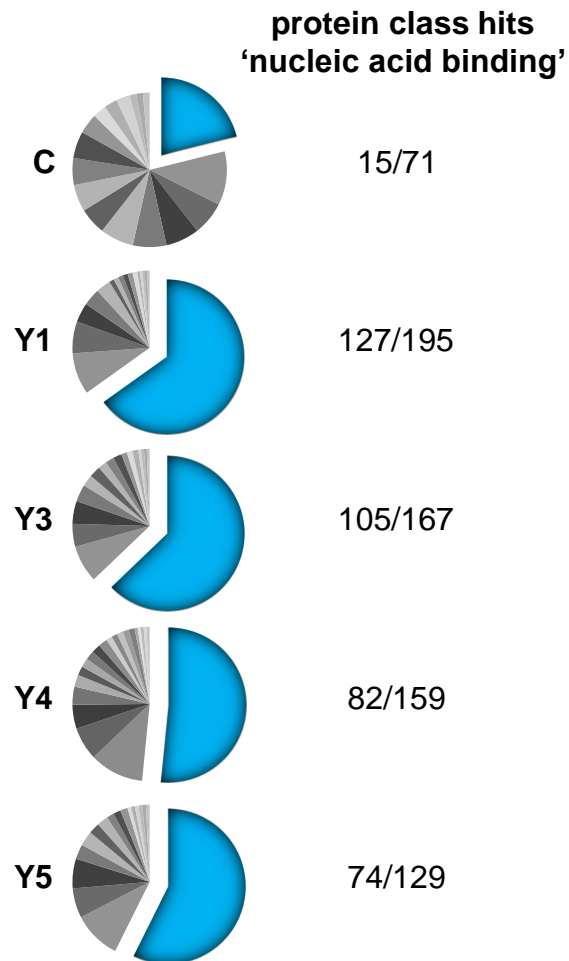

C

| Protein (Gene Symbol) | C          | Y1          | Y3          | Y4          | Y5          |
|-----------------------|------------|-------------|-------------|-------------|-------------|
| Ro60 (TROVE2)         |            | 46,8<br>39  | 52,2<br>52  | 53,0<br>64  | 50,7<br>63  |
| La (SSB)              | 6,1<br>7   | 76,2<br>175 | 77,2<br>171 | 77,2<br>211 | 78,2<br>222 |
| HNRNPK                |            | 53,8<br>76  | 17,7<br>5   | 5,0<br>1    | 7,8<br>3    |
| MATR3                 | 3,8<br>2   | 56,6<br>129 | 60,6<br>161 |             |             |
| IGF2BP1               | 10,1<br>10 | 61,2<br>102 | 61,2<br>182 | 60,3<br>163 | 48,4<br>49  |
| ELAVL1                |            | 3,4<br>1    | 50,6<br>40  | 3,4<br>1    | 3,4<br>1    |
| YBX1                  |            | 60,8<br>51  | 63,9<br>83  | 65,1<br>68  | 60,8<br>35  |
| PUF60                 | 5,6<br>1   | 34,9<br>23  | 14,3<br>9   | 17,0<br>7   | 60,3<br>68  |
| RPL13                 |            | 6,2<br>1    | 10,0<br>2   |             |             |
| CPSF160 (CPSF1)       |            | 4,3<br>6    | 11,4<br>16  |             |             |
| CPSF100 (CPSF2)       |            | 1,7<br>1    | 16,1<br>10  |             |             |
| CPSF73 (CPSF3)        |            |             | 5,3<br>3    |             |             |
| CPSF30 (CPSF4)        |            |             | 14,1<br>3   |             |             |
| hFIP1 (FIP1L1)        |            | 2,9<br>1    | 14,8<br>7   |             |             |
| WDR33                 |            |             | 11,0<br>13  |             |             |
| Symplekin (SYMPK)     |            | 2,2<br>2    | 4,1<br>4    |             |             |

3'-end processing factors

XX: Peptide coverage (PC) in %

XX: Peptide spectral matches (PSMs)

D

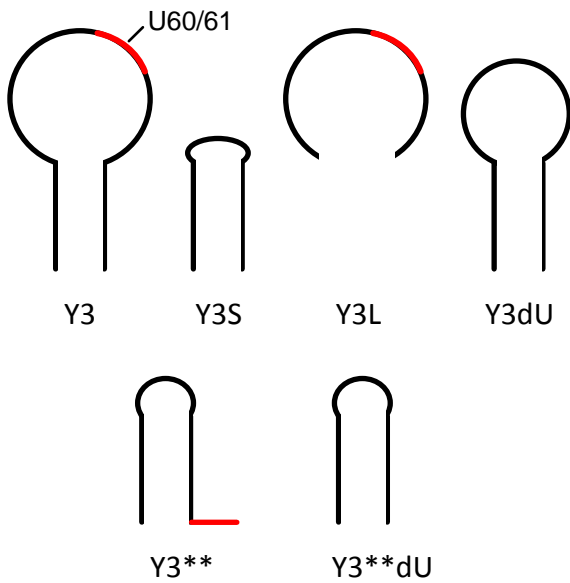

E

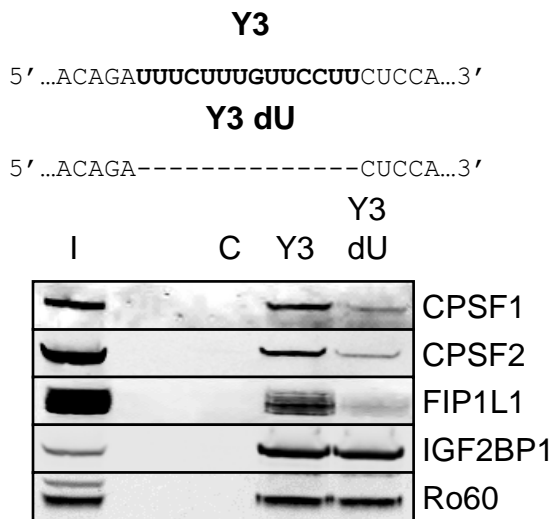

F

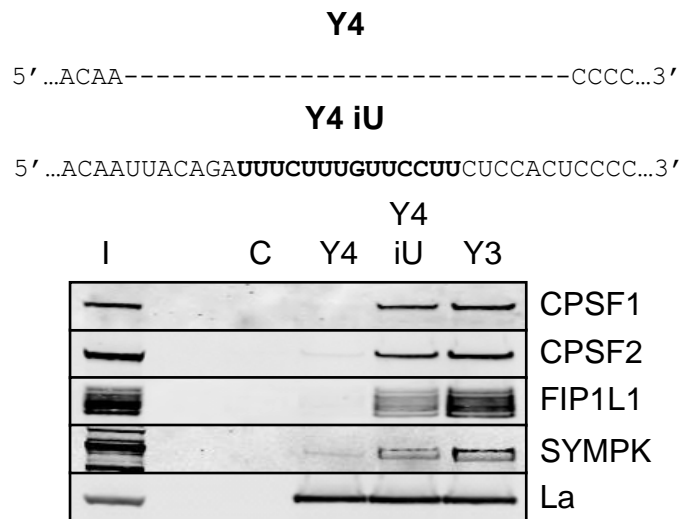

G

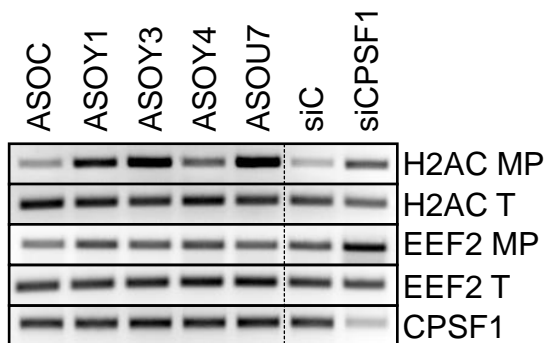

H

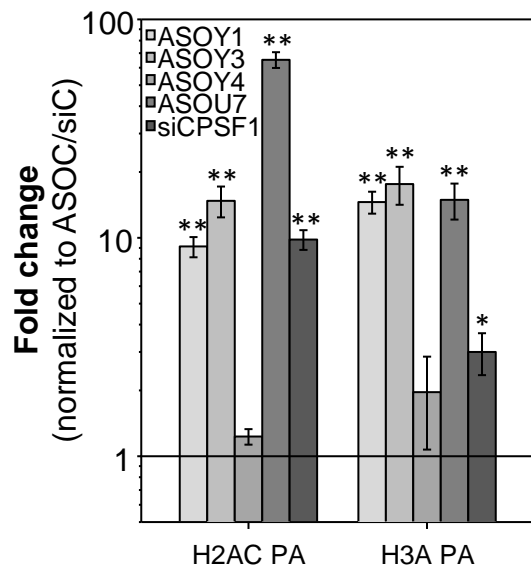

A

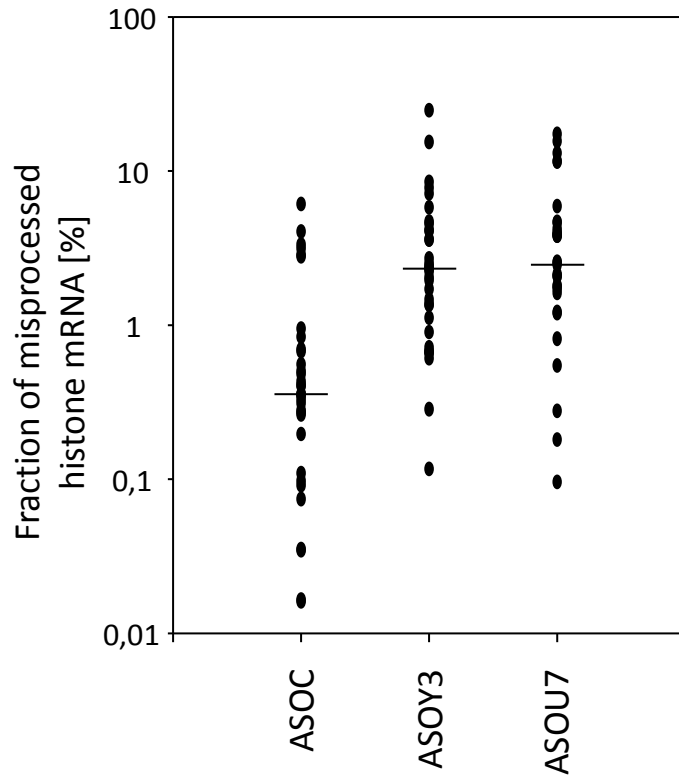

**A**

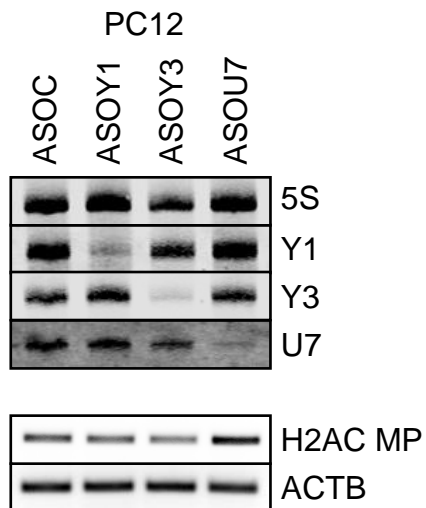

**B**

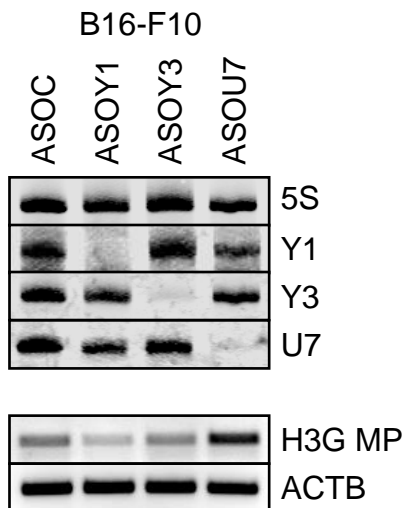

**C**

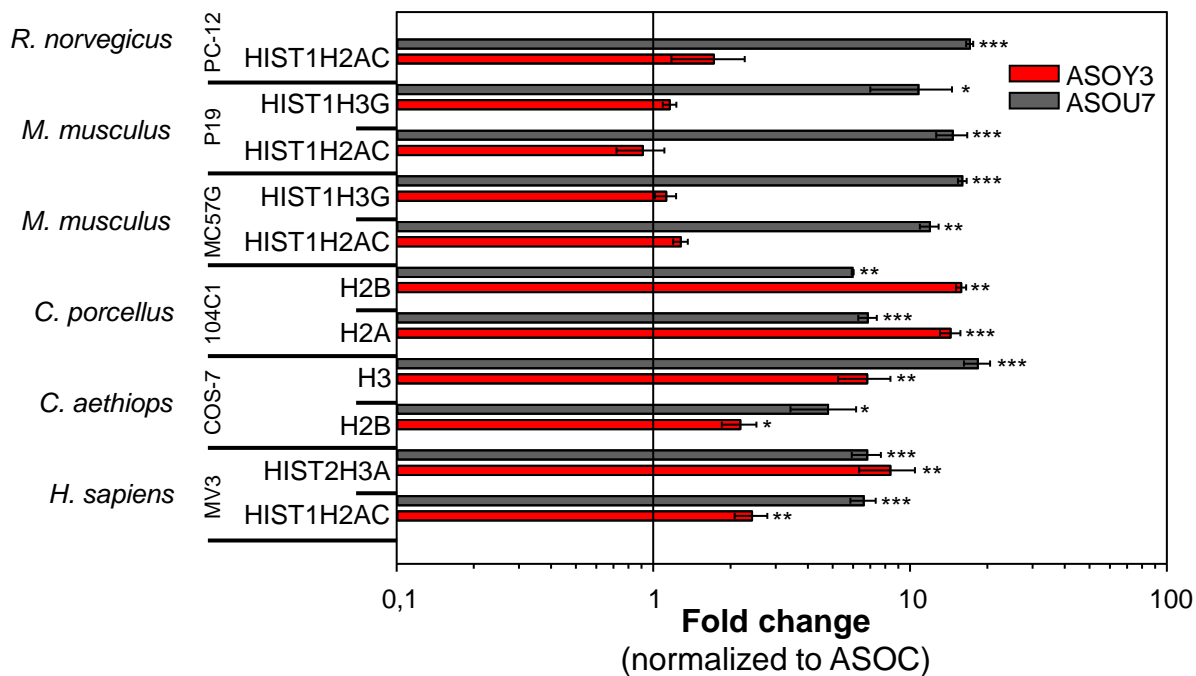

**D**

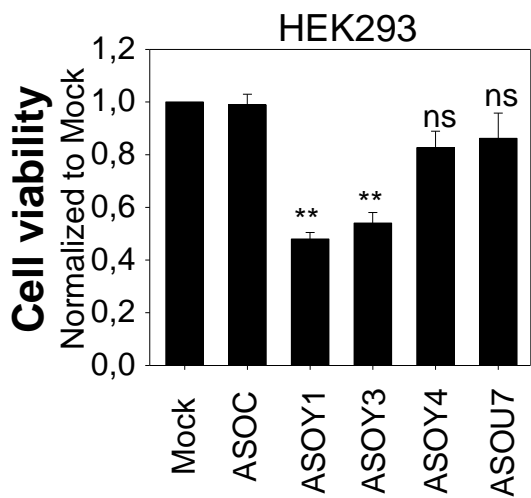

**E**

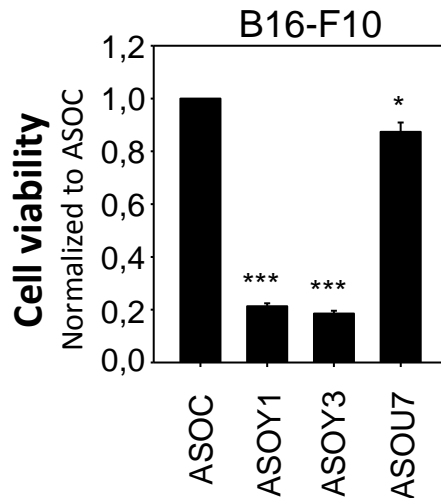

ASO/siRNA site

**Y3 FL** GGCTGGTCCGAGTGCAGTGGTGGTTTACAACCTAATTGATCACACCAGTTACAGATTTC**T**TGGTTCCTTCTCCACTCCCAGTGCTTCACTTGACTAGCCTTTT  
**#1** GGCTGGTCCGAGTGCAGTGGTGGTTTACAACCTAATTGATCACACCAGTTACAGATTTC**T**TGGT  
**#2** GGCTGGTCCGAGTGCAGTGGTGGTTTACAACCTAATTGATCACACCAGTTACAGATTTC**T**T  
**#3** GGCTGGTCCGAGTGCAGTGGTGGTTTACAACCTAATTGATCACACCAGTTACAGATTTC**T**T  
**#4** GGCTGGTCCGAGTGCAGTGGTGGTTTACAACCTAATTGATCACACCAGTTACAGATTTC**T**T  
**#5** GGCTGGTCCGAGTGCAGTGGTGGTTTACAACCTAATTGATCACACCAGTTACAGATTTC**T**  
**#6** GGCTGGTCCGAGTGCAGTGGTGGTTTACAACCTAATTGATCACACCAGTTACAGATTTC**T**  
**#7** GGCTGGTCCGAGTGCAGTGGTGGTTTACAACCTAATTGATCACACCAGTTACAGATTTC**T**  
**#8** GGCTGGTCCGAGTGCAGTGGTGGTTTACAACCTAATTGATCACACCAGTTACAGATTTC**T**  
**#9** GGCTGGTCCGAGTGCAGTGGTGGTTTACAACCTAATTGATCACACCAGTTACAGATTTC**T**  
**#10** GGCTGGTCCGAGTGCAGTGGTGGTTTACAACCTAATTGATCACACCAGTTACAGATTTC**T**A

**T** = T60 **T** = T61

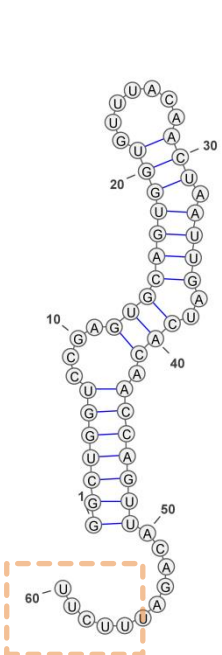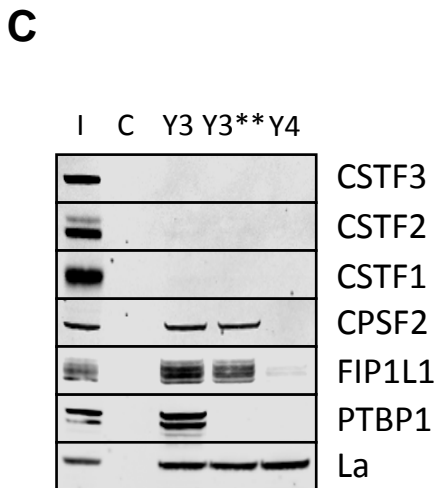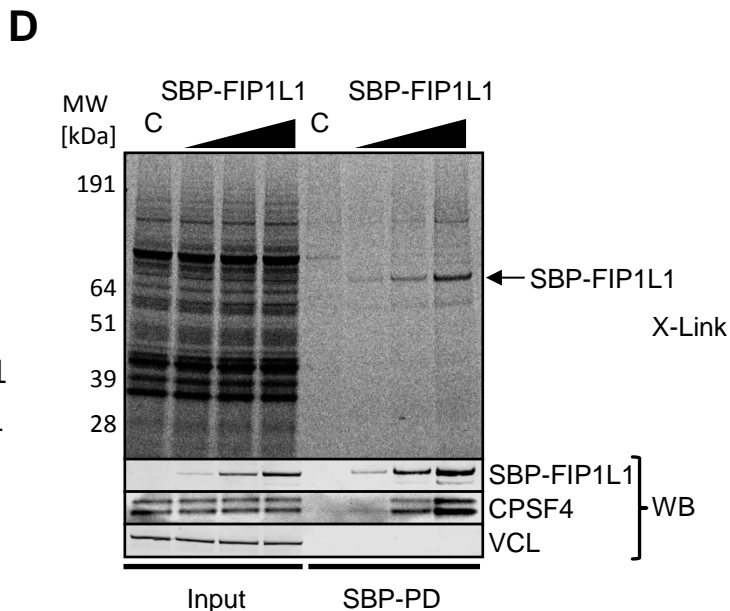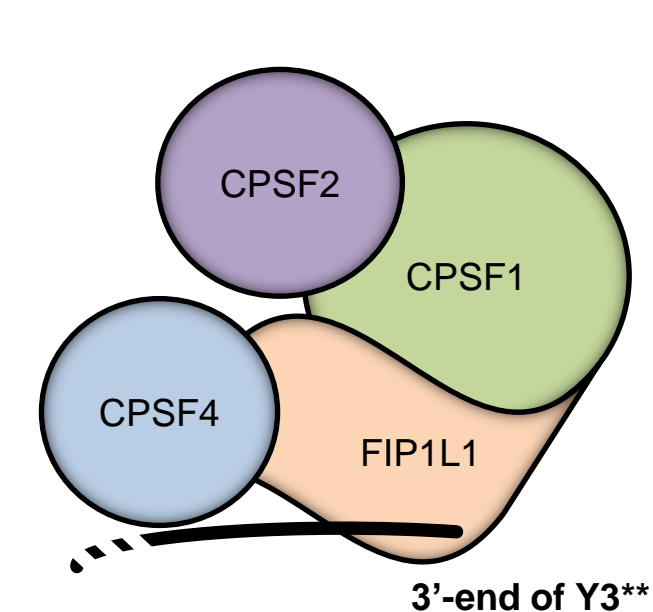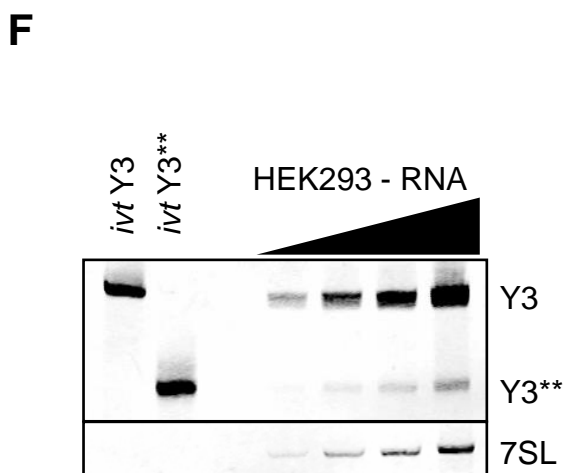

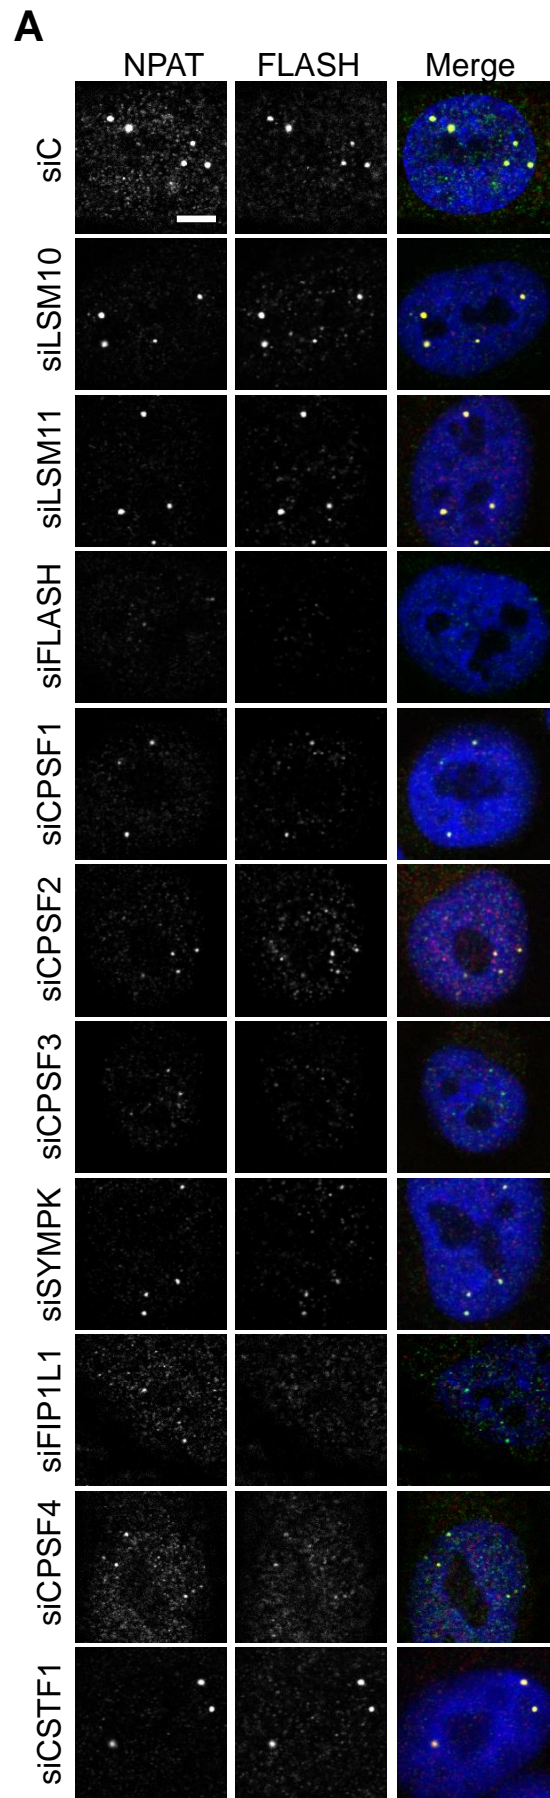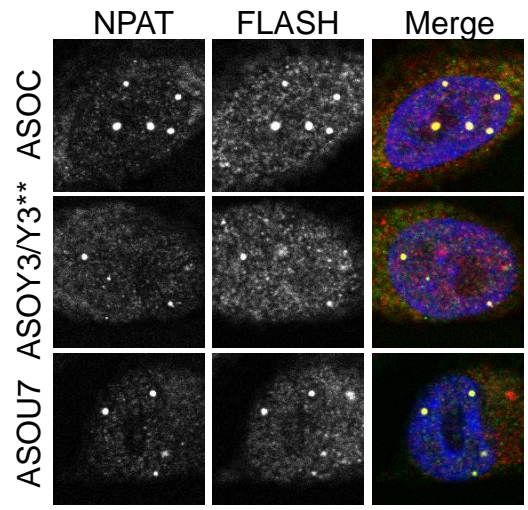

**B**

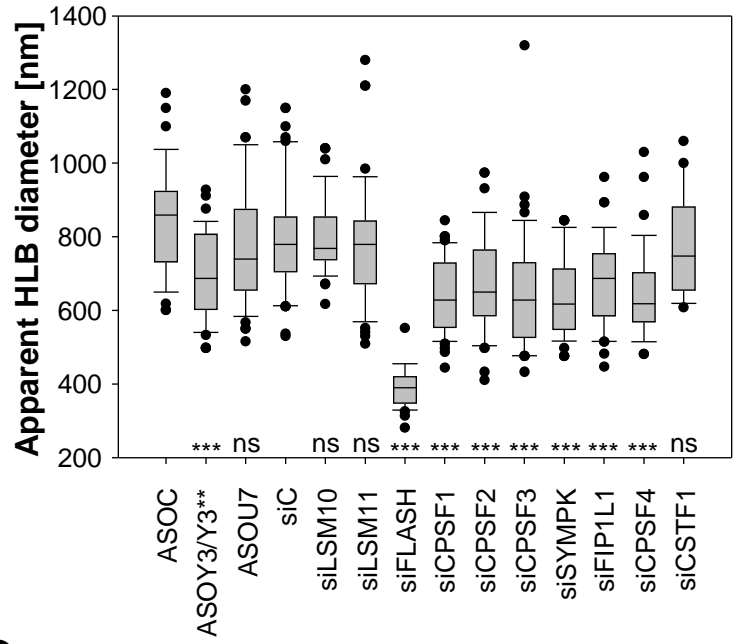

**C**

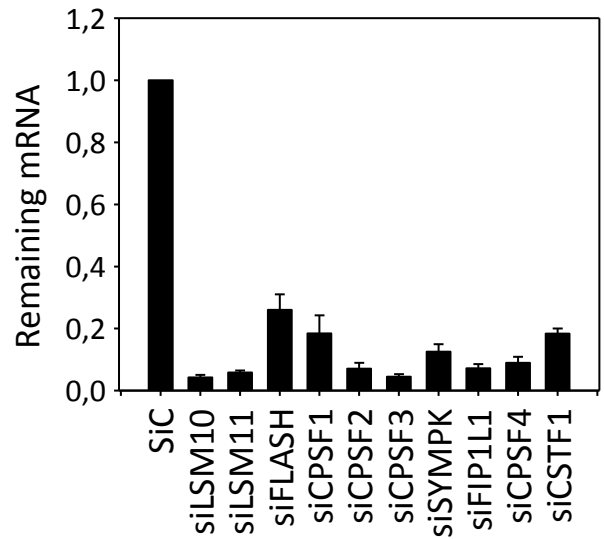

D

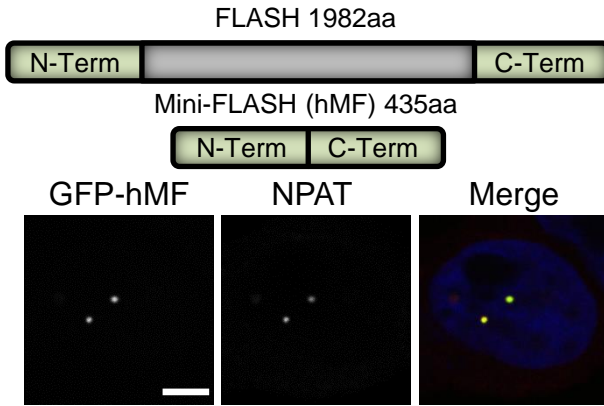

E

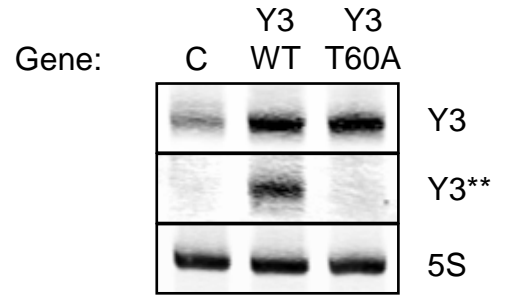

Supplement: supp_29.19.1998_SuppFigures.pdf [file supp_29.19.1998_SuppFigures.pdf]
